# Supplementary material for: Systematic Review and Critical Evaluation of Quality of Clinical Practice Guidelines on Nutrition in Pregnancy
Source: Healthcare (Basel). 2022 Dec 9;10(12):2490. doi: 10.3390/healthcare10122490 (PMC9778102; doi:10.3390/healthcare10122490)
Supplement: Supplementary file 1 [file healthcare-10-02490-s001.zip › Supplementar Table S2.pdf]

**Supplementary Table 2:** Critical evaluation of different topics on nutrition in pregnancy analyzed among different CPG

| <i>Issue</i><br><i>Guidelines tot = 18 (100%)</i>      | N (%)         |
|--------------------------------------------------------|---------------|
| <b>Scope</b>                                           |               |
| • International                                        | 3/18 (16,7%)  |
| • National                                             | 14/18 (77,8%) |
| • Local                                                | 1/18 (5,5%)   |
| <b>Method of developement</b>                          |               |
| • GRADE and GRADE-CERQual approaches, DECIDE framework | 1/18 (5,5%)   |
| • Review of literature, expert panel consensus         | 5/18 (27,8%)  |
| • Review of literature,expert opinion                  | 12/18 (66,7%) |
| <b>Vitamin A</b>                                       |               |
| • 800 mcg                                              | 4/18 (22%)    |
| • 700-750 mcg                                          | 3/18 (16,7%)  |
| • Not stated                                           | 9/18 (50%)    |
| • No                                                   | 2/18 (11,1%)  |
| <b>Vitamin C</b>                                       |               |
| • 55 mg                                                | 2/18 (11,1%)  |
| • 70 mg                                                | 2/18 (11,1%)  |
| • 85 mg                                                | 1/18 (5%)     |
| • 500 mg-1000 mg                                       | 1/18(5%)      |
| • Not stated                                           | 12/18 (66,7%) |
| • No                                                   | 0/18 (0%)     |
| <b>Vitamin D</b>                                       |               |
| • 600 mcg/die                                          | 1/18 (5%)     |
| • 400 mcg/die                                          | 4/18 (22%)    |
| • < o =10 mcg                                          | 3/18 (16,7%)  |
| • <o = 5 mcg                                           | 5/18 (27,8%)  |
| • 15 mcg                                               | 1/18 (5%)     |
| • < o = 50 mcg                                         | 1/18 (5%)     |
| • Not stated                                           | 3/18 (16,7%)  |
| <b>Vitamin E</b>                                       |               |
| • < 10 mg                                              | 1/18 (5%)     |
| • 10 mg                                                | 2/18 (11,1%)  |
| • 10-30 mg                                             | 3/18 (16,7%)  |
| • 30-60 mg                                             | 2/18 (11,1%)  |
| • 60-120 mg                                            | 1/18 (5%)     |
| • 200 mg                                               | 1/18 (5%)     |
| • Not stated                                           | 8/18 (44,4%)  |
| <b>Folic acid</b>                                      |               |
| • 200 mcg                                              | 5/18 (27,8%)  |
| • 400 mcg                                              | 7/18 (38,8%)  |
| • 600 mcg                                              | 3/18 (16,7%)  |
| • 400-600 mcg                                          | 1/18 (5%)     |
| • 400-800 mcg                                          | 1/18 (5%)     |
| • Not stated                                           | 1/18 (5%)     |
| <b>Iron</b>                                            |               |
| • 30-60 mg                                             | 3/18 (16,7%)  |
| • < o = 30 mg                                          | 7/18 (38,8%)  |
| • 60 mg                                                | 2/18 (11,1%)  |
| • No                                                   | 1/18 (5%)     |
| • Not stated                                           | 5/18 (27,8%)  |
| <b>Iodine</b>                                          |               |
| • 150 mcg                                              | 3/18 (16,7%)  |
| • 200 mcg                                              | 1/18(5%)      |
| • >200 mcg                                             | 3/18(16,7%)   |
| • 1,3 mg                                               | 1/18(5%)      |
| • 1,7 mg                                               | 1/18(5%)      |

|                    |               |
|--------------------|---------------|
| • No               | 1/18(5%)      |
| • Not stated       | 8/18 (44,4%)  |
| <b>Vitamin B1</b>  |               |
| • 1,4 mg           | 4/18(22%)     |
| • 18 mg            | 1/18(5%)      |
| • 10 mg            | 1/18(5%)      |
| • No               | 1/18(5%)      |
| • Not stated       | 11/18 (61,1%) |
| <b>Vitamin B2</b>  |               |
| • 1,4 mg           | 4/18(22%)     |
| • 1,9 mg           | 1/18(5%)      |
| • No               | 1/18(5%)      |
| • Not stated       | 12/18( 66,7%) |
| <b>Vitamin B6</b>  |               |
| • 1,9 mg           | 6/18 (33,3%)  |
| • 2,6 mg           | 2/18 (11,1%)  |
| • No               | 0/18 (0%)     |
| • Not stated       | 8/18 (44,4%)  |
| <b>Vitamin B12</b> |               |
| • 2,6 mcg          | 5/18 (27,8%)  |
| • 2,4 mcg          | 1/18 (5%)     |
| • 1,0 mcg          | 1/18(5%)      |
| • 80 mg            | 1/18(5%)      |
| • No               | 1/18(5%)      |
| • Not stated       | 9/18 (50%)    |
| <b>Calcium</b>     |               |
| • 1000-1300 mg     | 2 /18(11,1%)  |
| • 1000 mg          | 5/18(27,8%)   |
| • 600 mg           | 1/18(5%)      |
| • 400 mg           | 2/18(11,1%)   |
| • 5 mcg            | 1/18(5%)      |
| • No               | 1/18(5%)      |
| • Not stated       | 6/18 (33,3%)  |
| <b>Selenium</b>    |               |
| • 60-65 mcg        | 4/18(22%)     |
| • 30mcg            | 1/18(5%)      |
| • 700 mg           | 1/18(5%)      |
| • No               | 1/18(5%)      |
| • Not stated       | 11/18 (61,1%) |
| <b>Zinc</b>        |               |
| • 5 mg             | 1/18(5%)      |
| • 5-15 mg          | 5/18(27,8%)   |
| • 205 mg           | 1/18(5%)      |
| • No               | 1/18(5%)      |
| • Not stated       | 10/18 (55,6%) |
| <b>Copper</b>      |               |

|                                                                                                                                          |               |
|------------------------------------------------------------------------------------------------------------------------------------------|---------------|
| • 1,15 mg                                                                                                                                | 1/18(5%)      |
| • 2 mg                                                                                                                                   | 2/18(11,1%)   |
| • 8 mg                                                                                                                                   | 1/18(5%)      |
| • 1000 mg                                                                                                                                | 2/18(11,1%)   |
| • 800 mg                                                                                                                                 | 1/18(5%)      |
| • 1200-2000 mg                                                                                                                           | 2/18(11,1%)   |
| • No                                                                                                                                     | 1/18(5%)      |
| • Not stated                                                                                                                             | 8/18 (44,4%)  |
| <b>Biotin</b>                                                                                                                            |               |
| • 30 mcg                                                                                                                                 | 2/18(11,1%)   |
| • 35 mcg                                                                                                                                 | 1/18(5%)      |
| • No                                                                                                                                     | 1/18(5%)      |
| • Not stated                                                                                                                             | 14/18 (77,8%) |
| <b>Choline</b>                                                                                                                           |               |
| • 450 mg                                                                                                                                 | 2/18(11,1%)   |
| • 415 mg                                                                                                                                 | 1/18(5%)      |
| • 6 mg                                                                                                                                   | 1/18(5%)      |
| • No                                                                                                                                     | 1/18(5%)      |
| • Not stated                                                                                                                             | 13/18(72,2%)  |
| <b>Carbohydrates</b>                                                                                                                     |               |
| • 175 gr                                                                                                                                 | 3/18(16,7%)   |
| • No                                                                                                                                     | 1/18(5%)      |
| • Not stated                                                                                                                             | 14/18(77,8%)  |
| <b>Fibers</b>                                                                                                                            |               |
| • 30-35 gr                                                                                                                               | 1/18(5%)      |
| • 28 gr                                                                                                                                  | 1/18(5%)      |
| • No                                                                                                                                     | 0/18 (0%)     |
| • Not stated                                                                                                                             | 16/18 (88,9%) |
| <b>Protein</b>                                                                                                                           |               |
| • Additional 1gr/day in 1st trimester; additional 9gr/day in 2nd trimester; additional ≤ 28gr/day or one extra serving from food pyramid | 1/18(5%)      |
| • 0.8-1.0gr/kg in the first half of pregnancy, 1.1 gr/kg in the second half                                                              | 1/18(5%)      |
| • 450 mg/die                                                                                                                             | 1/18(5%)      |
| • 71 gr                                                                                                                                  | 1/18(5%)      |
| • 60 gr                                                                                                                                  | 1/18(5%)      |
| • 10 gr                                                                                                                                  | 1/18(5%)      |
| • No                                                                                                                                     | 0/18 (0%)     |
| • Not stated                                                                                                                             | 12/18 (66,7%) |
| <b>Fat</b>                                                                                                                               |               |
| • Omega 3- Omega 6                                                                                                                       | 1/18(5%)      |
| • 200-300 mg of dochosahexaenoic acid                                                                                                    | 1/18(5%)      |
| • Additional 700-1400 mg/week DHA                                                                                                        | 1/18(5%)      |

|                                                                                                     |               |
|-----------------------------------------------------------------------------------------------------|---------------|
| • >175 g                                                                                            | 1/18(5%)      |
| • No                                                                                                | 0/18 (0%)     |
| • Not stated                                                                                        | 14/18(77,8%)  |
| <b>Omega-3</b>                                                                                      |               |
| • 28g/die                                                                                           | 1/18(5%)      |
| • 200 mg DHA                                                                                        | 1/18(5%)      |
| • 700-1400 mg/week                                                                                  | 1/18(5%)      |
| • 1 g                                                                                               | 1/18(5%)      |
| • 300 mg                                                                                            | 1/18(5%)      |
| • 800 mg                                                                                            | 1/18(5%)      |
| • 1.4 gr                                                                                            | 1/18(5%)      |
| • No                                                                                                | 0/18 (0%)     |
| • Not stated                                                                                        | 11/18 (61,1%) |
| <b>Omega 6</b>                                                                                      |               |
| • aumentare 1g/die nel I trimestre, 8g/die nel II e 23-26g/die nel III trimestre                    | 2/18(11,1%)   |
| • 10 gr                                                                                             | 1/18(5%)      |
| • 13 gr                                                                                             | 1/18(5%)      |
| • No                                                                                                | 0/18(0%)      |
| • Not stated                                                                                        | 14/18(77,8%)  |
| <b>Mercury</b>                                                                                      |               |
| • 250 mg/die                                                                                        | 1/18(5%)      |
| • 150mg di pesce ricco in omega-3 /settimana                                                        | 1/18(5%)      |
| • No                                                                                                | 0/18(0%)      |
| • Not stated                                                                                        | 16/18(88,9%)  |
| <b>Hydration</b>                                                                                    |               |
| • 2-2.5 L of water                                                                                  | 3/18(16,7%)   |
| • No                                                                                                | 0/18(0%)      |
| • Not stated                                                                                        | 15/18(83,3%)  |
| <b>Alcohol</b>                                                                                      |               |
| • No                                                                                                | 4/18(22,2%)   |
| • Yes                                                                                               | 1/18(5%)      |
| <b>Weigh gain in pregnancy</b>                                                                      |               |
| • BMI < 18,5: 12,5-18,0 kg BMI 18,5-25 : 11,5 - 16,0 kg BMI 25-30: 7,0-11,5 kg BMI ≥ 30: 5,0-9,0 kg | 3/18(16,7%)   |
| • BMI < 18,5: 12,5-18,0 kg BMI 18,5-25 : 11,5 - 16,0 kg BMI 25-30: 7,0-11,5 kg BMI ≥ 30: ≤6.8       | 1/18(5%)      |
| • BMI ≥ 30: ≤6                                                                                      | 1/18 (5%)     |
| • Yes                                                                                               | 2/18 (11,1%)  |
| • No                                                                                                | 0/18(0%)      |
| <b>Prevention of food-borne diseases in pregnancy</b>                                               |               |
| •                                                                                                   | 1/18(5%)      |
| • Listeria, Salmonella                                                                              |               |
| • Listeria, Salmonella, Toxoplasma                                                                  | 1/18(5%)      |

|                                                                |               |
|----------------------------------------------------------------|---------------|
| • Listeria, Salmonella, Toxoplasma, Environmental contaminants | 1/18(5%)      |
| • Preventive anthelmintic treatment after first trimester      | 1/18(5%)      |
| • Yes                                                          | 1/18(5%)      |
| • No                                                           | 0/18 (0%)     |
| • Not specified                                                | 13/18 (72,2%) |
| <b>Nutrition in particular groups of pregnant women</b>        |               |
| • Adolescent, Multiple Pregnancy,Vegan and vegetarian Women    | 1/18(5%)      |
| • Multifetal pregnancy                                         | 1/18(5%)      |
| • Yes                                                          | 1/18(5%)      |
| • No                                                           | 0/18(0%)      |
| • Not specified                                                | 15/18 (83,3%) |
| <b>Maternal outcomes in association with optimal nutrition</b> |               |
| • Yes                                                          | 5/18(27,8%)   |
| • No                                                           | 0/18(0%)      |
| • Not specified                                                | 13/18(72,2)   |
| <b>Fetal/Neonatal outcomes (SGA)</b>                           |               |
| • Yes                                                          | 7/18(38,9%)   |
| • no                                                           | 0/18(0%)      |
| • Not specified                                                | 11/18(61,1%)  |
| <b>Fetal/Neonatal outcomes (Low birthweight)</b>               |               |
| • Yes                                                          | 5/18(27,8%)   |
| • No                                                           | 0/18(0%)      |
| • Not specified                                                | 13/18(72,2%)  |
| <b>Fetal/Neonatal outcomes (Preterm Birth)</b>                 |               |
| • Yes                                                          | 5/18(27,8%)   |
| • No                                                           | 0/18(0%)      |
| • Not specified                                                | 13/18(72,2%)  |
| <b>Fetal/Neonatal outcomes(Perinatal mortality)</b>            |               |
| • Yes                                                          | 1/18 (5%)     |
| • No                                                           | 1/18(5%)      |
| • Not specified                                                | 16/18(88,9%)  |
| <b>Fetal/Neonatal outcomes(Neonatal mortality)</b>             |               |
| • Yes                                                          | 3/18(16,6%)   |
| • No                                                           | 0/18(0%)      |
| • Not specified                                                | 15/18(83,3%)  |
| <b>Fetal/Neonatal outcomes(Stillbirth)</b>                     |               |
| • Yes                                                          | 3/18(16,7%)   |
| • No                                                           | 0/18(0%)      |
| • Not specified                                                | 15/18(83,3%)  |
| <b>Fetal/Neonatal outcomes Congenital anomalies</b>            |               |
| • Yes                                                          | 3/18(16,7%)   |
| • No                                                           | 0/18(0%)      |
| • Not specified                                                | 15/18(83,3%)  |
